# Supplementary material
Source: PubMed Central journal article supplement (PMC4483592)
Supplement: ASN.2014060620_ASN2014060620SupplementaryData.pdf [file ASN.2014060620_ASN2014060620SupplementaryData.pdf]

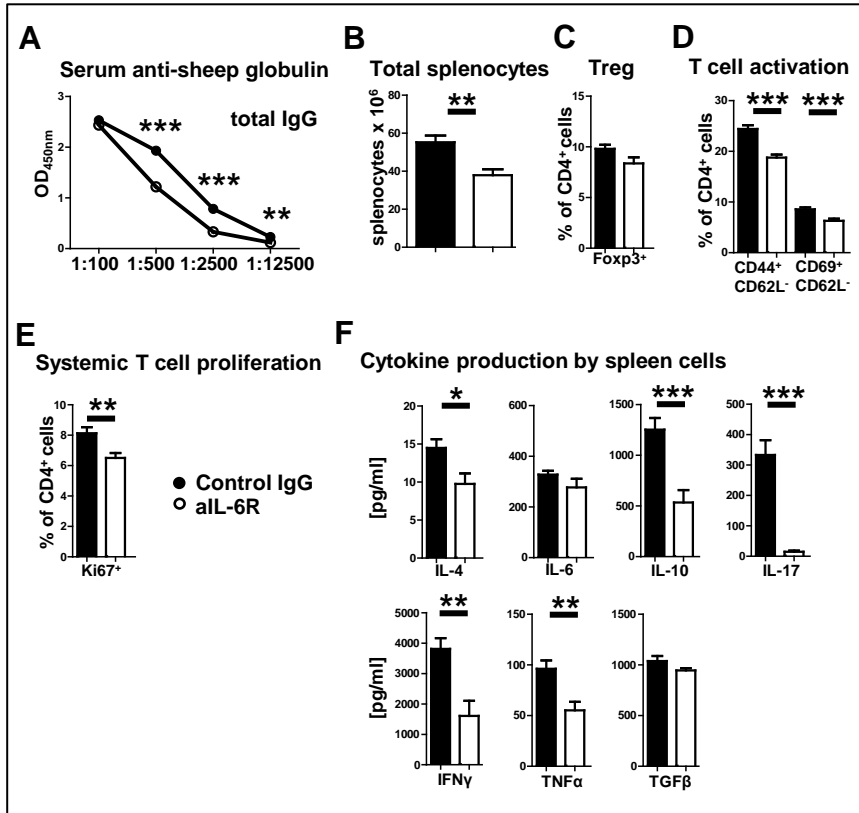

**Supplementary Figure S1. Systemic immune responses in anti-IL-6R treated mice.** (A) Quantification of sheep IgG specific total serum IgG at the indicated dilutions. (B) Quantification of total spleen cells. (C) Percentages of splenic Foxp3<sup>+</sup> Tregs. (D) Quantification of splenic T helper cell activation. (E) Quantification of T helper cell proliferation. (F) Production of the indicated cytokines by spleen cells. Error bars represent standard deviation. \*P<0.05, \*\*P<0.01, \*\*\*P<0.001.

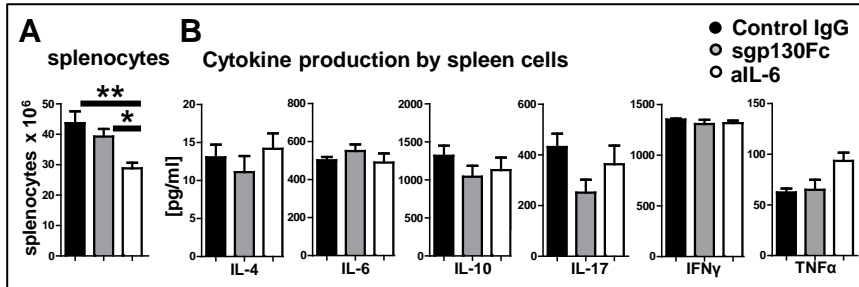

**Supplementary Figure S2. Systemic immune responses in anti-IL-6 and sgp130Fc treated mice.** (A) Quantification of total spleen cells of the indicated groups. (B) Production of the indicated cytokines by spleen cells. Error bars represent standard deviation. \*P<0.05, \*\*P<0.01.

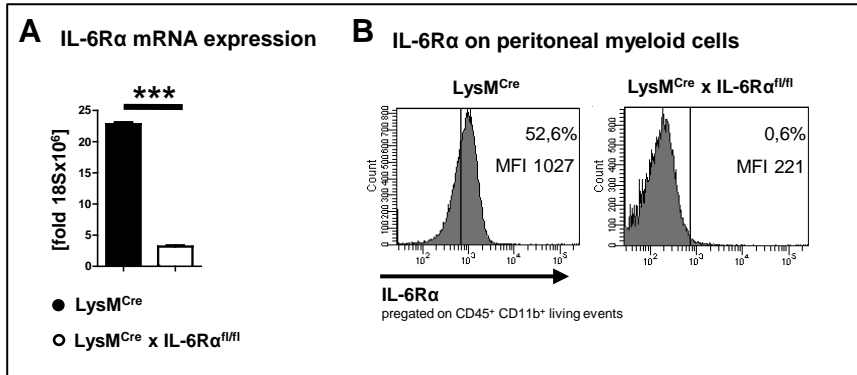

**Supplementary Figure S3. Effective knockout of IL-6R $\alpha$**

(A) Real time qPCR Analysis of IL-6R $\alpha$  mRNA expression in thioglycollate elicited peritoneal myeloid cells relative to 18s. (B) Representative FACS analysis of IL-6R $\alpha$  expression on thioglycollate elicited peritoneal myeloid cells.

\*\*\*P<0.001.

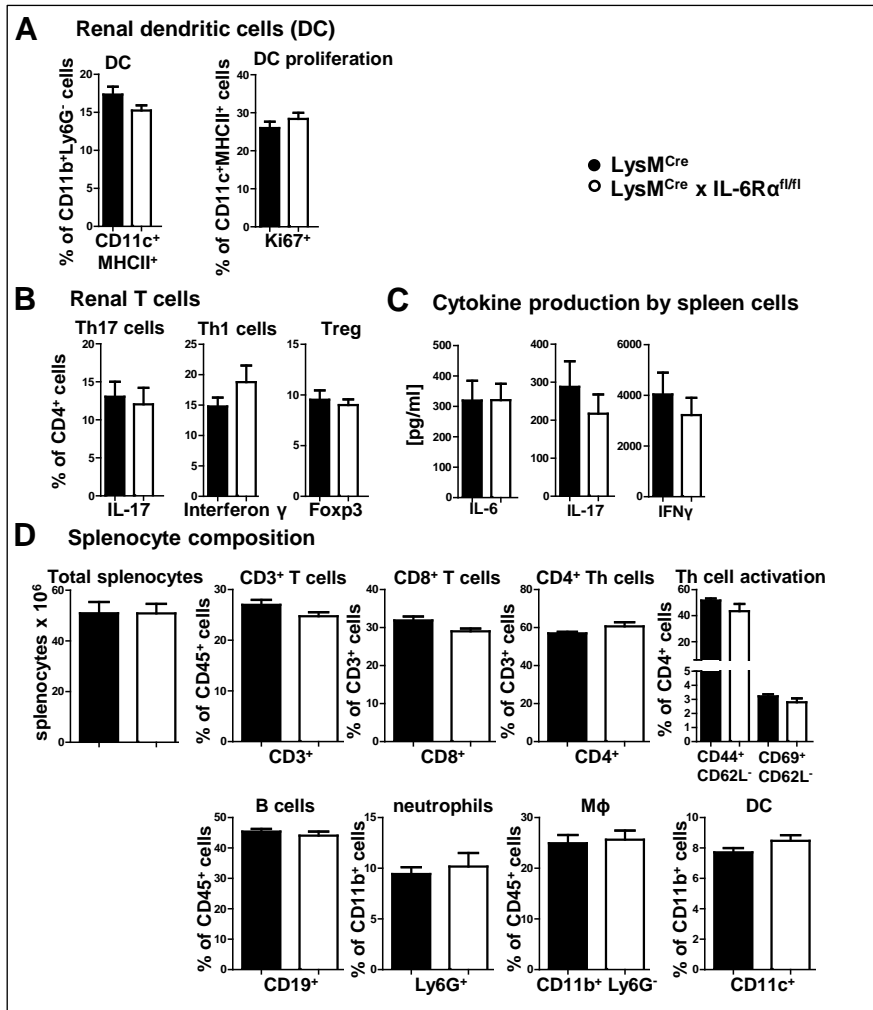

**SUPPLEMENTARY FIGURE S4. Renal and systemic immunity in LysM<sup>Cre</sup> x IL-6Rα<sup>fl/fl</sup> mice.**

(A) FACS analysis of renal dendritic cell infiltration and proliferation. (B) FACS analysis of renal T cell subset composition. (C) Cytokine production by spleen cells of the indicated cytokines. (D) Analyses of spleen cell numbers and percentages of the indicated leukocyte subsets. Error bars represent standard deviation.
